# Supplementary material for: Alkyl substituted poly(p-phenylene vinylene)s by ring opening metathesis polymerisation
Source: Royal Society of Chemistry journal article supplement (doi:10.1039/c6py01186a), 2016-01-01
Supplement: c6py01186a1.pdf [file c6py01186a1.pdf]

## Supplementary Information

### Alkyl Substituted Poly(*p*-phenylene vinylene)s by Ring Opening Metathesis Polymerisation

Benjamin J. Lidster, Dharam R. Kumar, Andrew M. Spring,<sup>‡</sup> Chin-Yang Yu,<sup>§</sup> and  
Michael L. Turner.\*

Organic Materials Innovation Centre, School of Chemistry, The University of Manchester, Oxford Road,  
Manchester, M13 9PL, UK.

<sup>‡</sup> Current address: Institute for Materials Chemistry and Engineering, Kyushu University, 6-1 Kasuga-koen  
Kasuga, Fukuoka 816-8580, Japan.

<sup>§</sup> Current address: Department of Materials Science and Engineering, National Taiwan University of Science  
and Technology, 43, Section 4, Keelung Road, Taipei, 10607, Taiwan.

\*Corresponding author: E-mail: Michael.Turner@Manchester.ac.uk; Fax: +44-161-275-4273

## Contents

|                                                                                                                                                                                                                                                                        |    |
|------------------------------------------------------------------------------------------------------------------------------------------------------------------------------------------------------------------------------------------------------------------------|----|
| 1. General Procedures .....                                                                                                                                                                                                                                            | 4  |
| 2. Synthesis of <i>cis/trans</i> -vinylene Poly( <i>p</i> -phenylenevinylene-2,5-dioctyl- <i>p</i> -phenylenevinylene)s ( <b>P1a-d</b> ) and <i>trans</i> -vinylene Poly( <i>p</i> -phenylenevinylene-2,5-dioctyl- <i>p</i> -phenylenevinylene)s ( <b>P2a-b</b> )..... | 5  |
| 3. Synthesis of <i>cis/trans</i> -vinylene Poly(2,5-dioctyl- <i>p</i> -phenylenevinylene)s ( <b>P3a-c</b> ).....                                                                                                                                                       | 6  |
| 4. Synthesis of $\alpha$ -Bromoester Functionalised Monotelechelic Poly( <i>p</i> -phenylenevinylene-2,5-dioctyl- <i>p</i> -phenylenevinylene)s ( <b>P4</b> ) .....                                                                                                    | 7  |
| 5. <sup>1</sup> H NMR (CDCl <sub>3</sub> , 400 MHz) of <i>cis/trans</i> -vinylene Poly( <i>p</i> -phenylenevinylene-2,5-dioctyl- <i>p</i> -phenylenevinylene)s ( <b>P1a</b> ).....                                                                                     | 8  |
| 6. <sup>1</sup> H NMR (CDCl <sub>3</sub> , 400 MHz) of <i>cis/trans</i> -vinylene Poly( <i>p</i> -phenylenevinylene-2,5-dioctyl- <i>p</i> -phenylenevinylene)s ( <b>P1b</b> ) .....                                                                                    | 9  |
| 7. <sup>1</sup> H NMR (CDCl <sub>3</sub> , 400 MHz) of <i>cis/trans</i> -vinylene Poly( <i>p</i> -phenylenevinylene-2,5-dioctyl- <i>p</i> -phenylenevinylene)s ( <b>P1c</b> ).....                                                                                     | 10 |
| 8. <sup>1</sup> H NMR (CDCl <sub>3</sub> , 400 MHz) of <i>cis/trans</i> -vinylene Poly( <i>p</i> -phenylenevinylene-2,5-dioctyl- <i>p</i> -phenylenevinylene)s ( <b>P1d</b> ) .....                                                                                    | 11 |
| 9. <sup>1</sup> H NMR (CDCl <sub>3</sub> , 400 MHz) of <i>trans</i> -vinylene Poly( <i>p</i> -phenylenevinylene-2,5-dioctyl- <i>p</i> -phenylenevinylene)s ( <b>P2a</b> ).....                                                                                         | 12 |
| 10. <sup>1</sup> H NMR (CDCl <sub>3</sub> , 500 MHz) of <i>trans</i> -vinylene Poly( <i>p</i> -phenylenevinylene-2,5-dioctyl- <i>p</i> -phenylenevinylene)s ( <b>P2b</b> ) .....                                                                                       | 13 |
| 11. <sup>1</sup> H NMR (C <sub>6</sub> D <sub>6</sub> , 400 MHz) of <i>cis/trans</i> -vinylene Poly(2,5-dioctyl- <i>p</i> -phenylenevinylene)s ( <b>P3a</b> ) .....                                                                                                    | 14 |
| 12. <sup>1</sup> H NMR (CDCl <sub>3</sub> , 500 MHz) of <i>cis/trans</i> -vinylene Poly(2,5-dioctyl- <i>p</i> -phenylenevinylene)s ( <b>P3b</b> ) .....                                                                                                                | 15 |
| 13. <sup>1</sup> H NMR (CDCl <sub>3</sub> , 500 MHz) of <i>cis/trans</i> -vinylene Poly(2,5-dioctyl- <i>p</i> -phenylenevinylene)s ( <b>P3c</b> ).....                                                                                                                 | 16 |
| 14. <sup>1</sup> H NMR (CDCl <sub>3</sub> , 400 MHz) of $\alpha$ -Bromoester Functionalised Monotelechelic Poly( <i>p</i> -phenylenevinylene-2,5-dioctyl- <i>p</i> -phenylenevinylene)s ( <b>P4</b> ).....                                                             | 17 |
| 15. GPC Trace of $\alpha$ -Bromoester Functionalised Monotelechelic Poly( <i>p</i> -phenylenevinylene-2,5-dioctyl- <i>p</i> -phenylenevinylene)s ( <b>P4</b> ).....                                                                                                    | 18 |

|     |                                                                                                                                                                                                                                                                                                                                                                                                                                                                                                                                                       |    |
|-----|-------------------------------------------------------------------------------------------------------------------------------------------------------------------------------------------------------------------------------------------------------------------------------------------------------------------------------------------------------------------------------------------------------------------------------------------------------------------------------------------------------------------------------------------------------|----|
| 16. | Reactivity of <b>M3</b> with <b>G3</b> and <b>G2</b> .....                                                                                                                                                                                                                                                                                                                                                                                                                                                                                            | 19 |
| 17. | Measurement of Photoluminescence Quantum Yields of <i>cis/trans</i> -vinylene Poly( <i>p</i> -phenylenevinylene-2,5-dioctyl- <i>p</i> -phenylenevinylene)s ( <b>P1a-d</b> ), <i>trans</i> -vinylene Poly( <i>p</i> -phenylenevinylene-2,5-dioctyl- <i>p</i> -phenylenevinylene)s ( <b>P2a-b</b> ), <i>cis/trans</i> -vinylene Poly(2,5-dioctyl- <i>p</i> -phenylenevinylene)s ( <b>P3a-c</b> ) and $\alpha$ -Bromoester Functionalised Monotelechelic Poly( <i>p</i> -phenylenevinylene-2,5-dioctyl- <i>p</i> -phenylenevinylene)s ( <b>P4</b> )..... | 19 |
| 18. | References .....                                                                                                                                                                                                                                                                                                                                                                                                                                                                                                                                      | 20 |

## 1. General Procedures

Nuclear magnetic resonance (NMR) spectra were obtained on Bruker spectrometers operating at either 400 or 500 MHz, for  $^1\text{H}$  nuclei. Chemical shifts are reported in ppm relative to the indicated residual solvent ( $^1\text{H}$  NMR spectroscopy: 7.26 ppm for D-chloroform, 7.16 ppm for  $\text{D}_6$ -benzene). MALDI-TOF-MS was carried out using a Shimadzu Biotech AXIMA Confidence MALDI mass spectrometer in linear (positive) mode. Calibration was conducted against poly(propylene glycol) ( $M_n = 4.0 \text{ kg mol}^{-1}$ ) (**P1a** and **P3a**) or Polymer Factory SpheriCal<sup>®</sup> MALDI-TOF-MS calibration standards (series of four monodisperse dendrimers in mass range 1716.82-3424.63 Da) (**P4**). The polymer solution (50  $\mu\text{L}$ , 1  $\text{mg mL}^{-1}$  in THF) was mixed with 50  $\mu\text{L}$  of a 10  $\text{mg mL}^{-1}$  solution of the matrix (dithranol) in THF. A drop of this solution was spotted onto a MALDI plate which had been pre-spotted with sodium iodide in THF (10  $\text{mg mL}^{-1}$ ). Fourier transform-infrared (FT-IR) spectroscopy was conducted using a Nicolet iS5 (Thermo Scientific) with iD5 attenuated total reflection accessory. Gel permeation chromatography (GPC) was carried out in THF using a Viscotek GPCmax VE2001 solvent/sample module with 2  $\times$  PL gel 10  $\mu\text{m}$  MIXED-B + 1  $\times$  PL gel 500A columns, a Viscotek VE3580 RI detector. The system was calibrated with narrow  $D_m$  PS standards with  $M_n$  between 0.2-1.8  $\times 10^3 \text{ kg mol}^{-1}$  (Polymer Laboratories). The eluent was THF at 40  $^\circ\text{C}$ , with a flow rate of 1  $\text{mL min}^{-1}$ . The analysed samples contained *n*-dodecane as flow marker. UV-Vis absorption spectra and photoluminescence spectra were recorded in chloroform on Varian Cary 5000 UV-Vis-NIR and Cary Eclipse Fluorescence Spectrophotometers. THF was freshly distilled over sodium/benzophenone and deoxygenated by freeze-pump-thaw (minimum of three cycles). 2nd Generation Grubbs Catalyst (**G2**) was obtained from Sigma-Aldrich and used as received. 3rd Generation Grubbs Catalyst (**G3**) was prepared by the procedure of Grubbs *et al.*, by the reaction of **G2** with an excess of 3-bromopyridine.<sup>1</sup> Ethyl vinyl ether was obtained from Sigma-Aldrich and deoxygenated by purging with argon for 2 hours.

## 2. Synthesis of *cis/trans*-vinylene Poly(*p*-phenylenevinylene-2,5-dioctyl-*p*-phenylenevinylene)s (**P1a-d**) and *trans*-vinylene Poly(*p*-phenylenevinylene-2,5-dioctyl-*p*-phenylenevinylene)s (**P2a-b**)

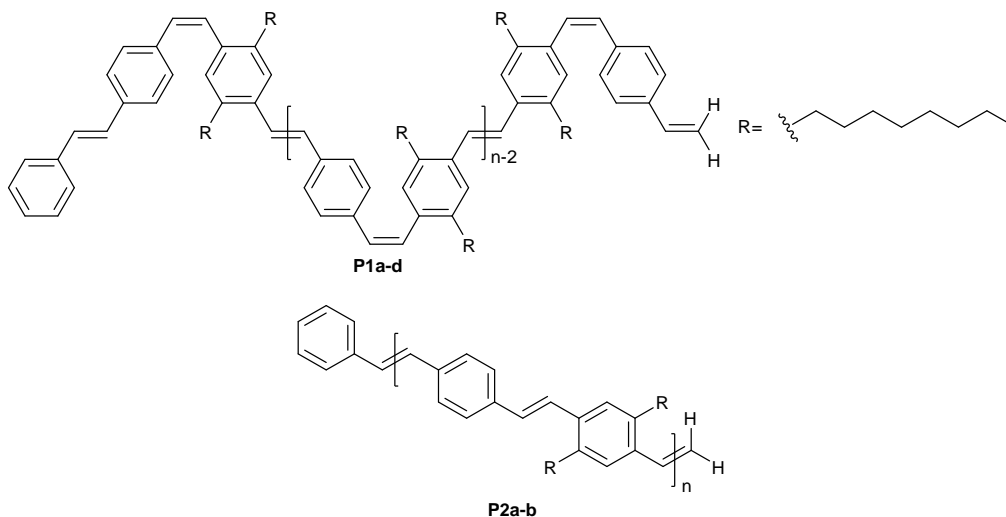

**General procedure for synthesis of polymers P1a-d:** In an argon filled glovebox cyclophanediene **M1** and **G3** were added to a vial with a stirrer bar, followed by deoxygenated, anhydrous THF ( $[\mathbf{M1}]_{\text{I}} = [0.1]_{\text{I}}$ ). The vial was sealed, removed from the glovebox, wrapped in foil and mixed at room temperature for 10 minutes. The reaction was placed in a preheated oil bath at 40 °C and stirred until complete monomer conversion. The reaction was cooled to room temperature and deoxygenated ethyl vinyl ether was added and stirred at room temperature for 2 hours. The reaction was precipitated into a short methanol/Celite column, washed with methanol and the polymer extracted with chloroform. After evaporation of the solvent polymers **P1a-d** were isolated as green films.

**General procedure for photoisomerisation of polymers P1a-b:** Polymers **P1a-b** (**P1a**; 21 mg and **P1b**; 18 mg) were dissolved in deoxygenated THF (**P1a**; 14 mL and **P1b**; 14 mL) in an argon filled glovebox. The vial was sealed, removed from the glovebox and irradiated with  $\lambda = 365$  nm for 24 hours. After evaporation of the solvent polymers **P2a-b** were isolated as green films (**P2a**; 19 mg, 91% and **P2b**; 15 mg, 83%).

### Quantities of reagents used:

| Polymer    | [M1]/[G3] | M1                            | G3                             | THF     | Reaction Time | Yield         |
|------------|-----------|-------------------------------|--------------------------------|---------|---------------|---------------|
| <b>P1a</b> | 10        | 32 mg,<br>75 $\mu\text{mol}$  | 6.6 mg,<br>7.5 $\mu\text{mol}$ | 0.75 mL | 1.5 hours     | 27 mg,<br>82% |
| <b>P1b</b> | 20        | 46 mg,<br>107 $\mu\text{mol}$ | 4.8 mg,<br>5.4 $\mu\text{mol}$ | 1.10 mL | 2 hours       | 42 mg,<br>89% |
| <b>P1c</b> | 30        | 49 mg,<br>114 $\mu\text{mol}$ | 3.4 mg,<br>3.8 $\mu\text{mol}$ | 1.14 mL | 4 hours       | 41 mg,<br>84% |
| <b>P1d</b> | 40        | 54 mg,<br>126 $\mu\text{mol}$ | 2.8 mg,<br>2.6 $\mu\text{mol}$ | 1.26 mL | 4 hours       | 47 mg,<br>87% |

### 3. Synthesis of *cis/trans*-vinylene Poly(2,5-dioctyl-*p*-phenylenevinylene)s (P3a-c)

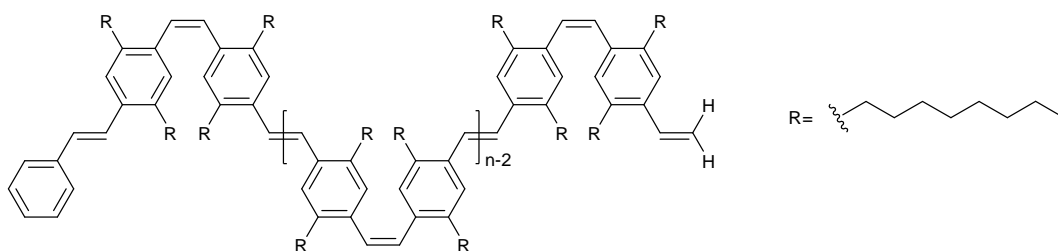

**General procedure for the syntheses of polymers P3a-c:** In an argon filled glovebox mixture of cyclophanedienes **M2** and **M3**, and **G3** were added to a vial with a stirrer bar, followed by deoxygenated anhydrous THF ( $[\text{M2}]_{\text{I}} = [0.1]_{\text{I}}$ ). The vial was sealed, removed from the glovebox, wrapped in foil and mixed at room temperature for 10 minutes. The reaction was placed in a preheated oil bath at 40 °C and stirred until complete monomer conversion. After which the reaction was cooled to room temperature and deoxygenated ethyl vinyl ether was added and stirred at room temperature 2 hours. The reaction was precipitated by adding acetone, then poured onto a short Celite column, washed with acetone and the polymers extracted with hot chloroform. After evaporation of the solvent the polymers were isolated as green films.

### Quantities of reagents used:

| Polymer    | [M2]/[G3] | Mixture of M2 and M3                    | G3                       | THF     | Reaction time | Yield         |
|------------|-----------|-----------------------------------------|--------------------------|---------|---------------|---------------|
| <b>P3a</b> | 10        | 101 mg<br>(17.2 mg,<br>26.3 $\mu$ mol)  | 2.3 mg,<br>2.6 $\mu$ mol | 0.26 mL | 4 hours       | 11 mg,<br>63% |
| <b>P3b</b> | 20        | 211 mg<br>(35.9 mg,<br>54.9 $\mu$ mol)  | 2.4 mg,<br>2.8 $\mu$ mol | 0.55 mL | 6 hours       | 21 mg,<br>58% |
| <b>P3c</b> | 30        | 212 mg,<br>(36.0 mg,<br>55.2 $\mu$ mol) | 1.6 mg,<br>1.8 $\mu$ mol | 0.55 mL | 8 hours       | 28 mg,<br>78% |

### 4. Synthesis of $\alpha$ -Bromoester Functionalised Monotelechelic Poly(*p*-phenylenevinylene-2,5-dioctyl-*p*-phenylenevinylene)s (**P4**)

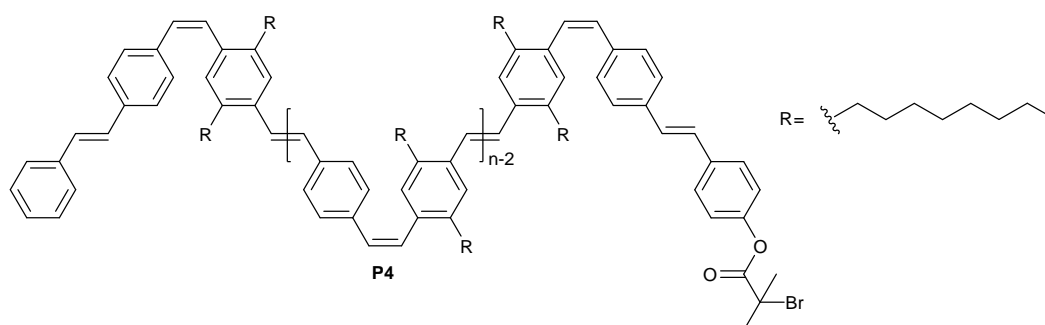

In an argon filled glovebox **M1** (30 mg, 70  $\mu$ mol) and **G3** (6.2 mg, 7.0  $\mu$ mol) were added to a vial and dissolved in deoxygenated anhydrous THF ( $[\mathbf{M1}] = [0.1]$ , 0.70 mL). The vial was sealed, removed from the glovebox, wrapped in foil and mixed at room temperature for 10 minutes. The solution was placed in a preheated oil bath at 40 °C and stirred for 3 hours. The reaction was cooled to room temperature, transferred back to the glovebox and quenched with 4-[(*E/Z*)-2-methoxyvinyl]phenyl-2-bromoisobutyrate (41.9 mg, 140  $\mu$ mol). The vial was sealed, removed from the glovebox, wrapped in foil and stirred for an additional 24 hours at 40 °C. The reaction was cooled to room temperature, precipitated into a short methanol/Celite column, washed with methanol and the polymer extracted with hot chloroform. The procedure was repeated once further and after evaporation of the solvent polymer **P4** was isolated as a green film (31 mg, 95%).

5.  $^1\text{H}$  NMR ( $\text{CDCl}_3$ , 400 MHz) of *cis/trans*-vinylene Poly(*p*-phenylenevinylene-2,5-dioctyl-*p*-phenylenevinylene)s (P1a)

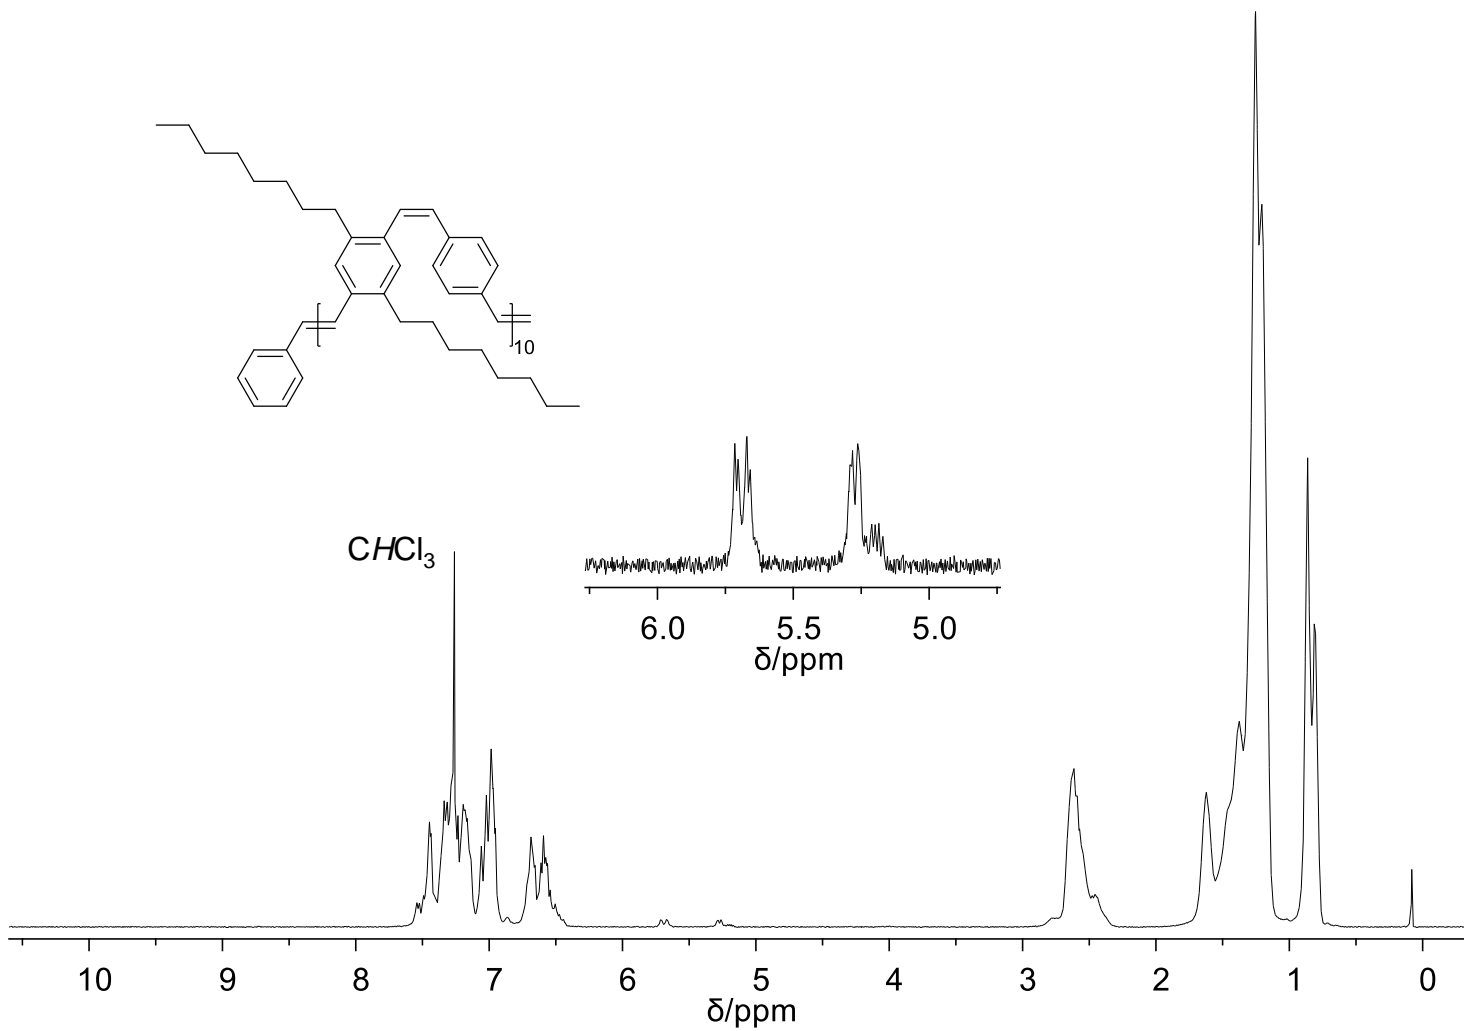



6.  $^1\text{H}$  NMR ( $\text{CDCl}_3$ , 400 MHz) of *cis/trans*-vinylene Poly(*p*-phenylenevinylene-2,5-dioctyl-*p*-phenylenevinylene)s (P1b)

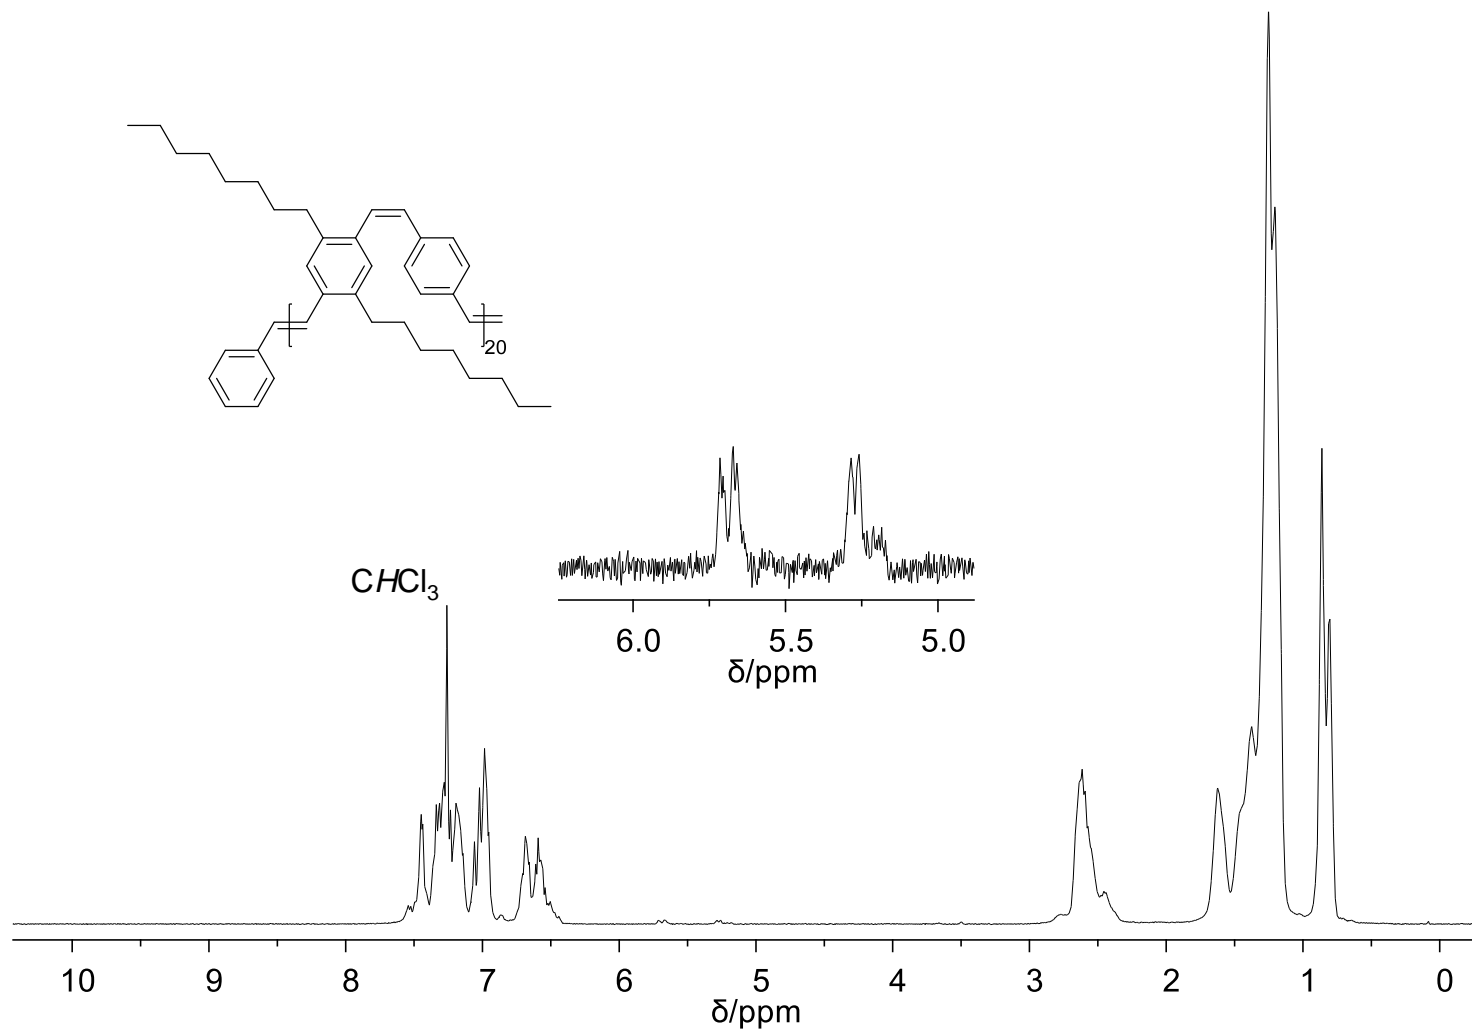

7.  $^1\text{H}$  NMR ( $\text{CDCl}_3$ , 400 MHz) of *cis/trans*-vinylene Poly(*p*-phenylenevinylene-2,5-dioctyl-*p*-phenylenevinylene)s (P1c)

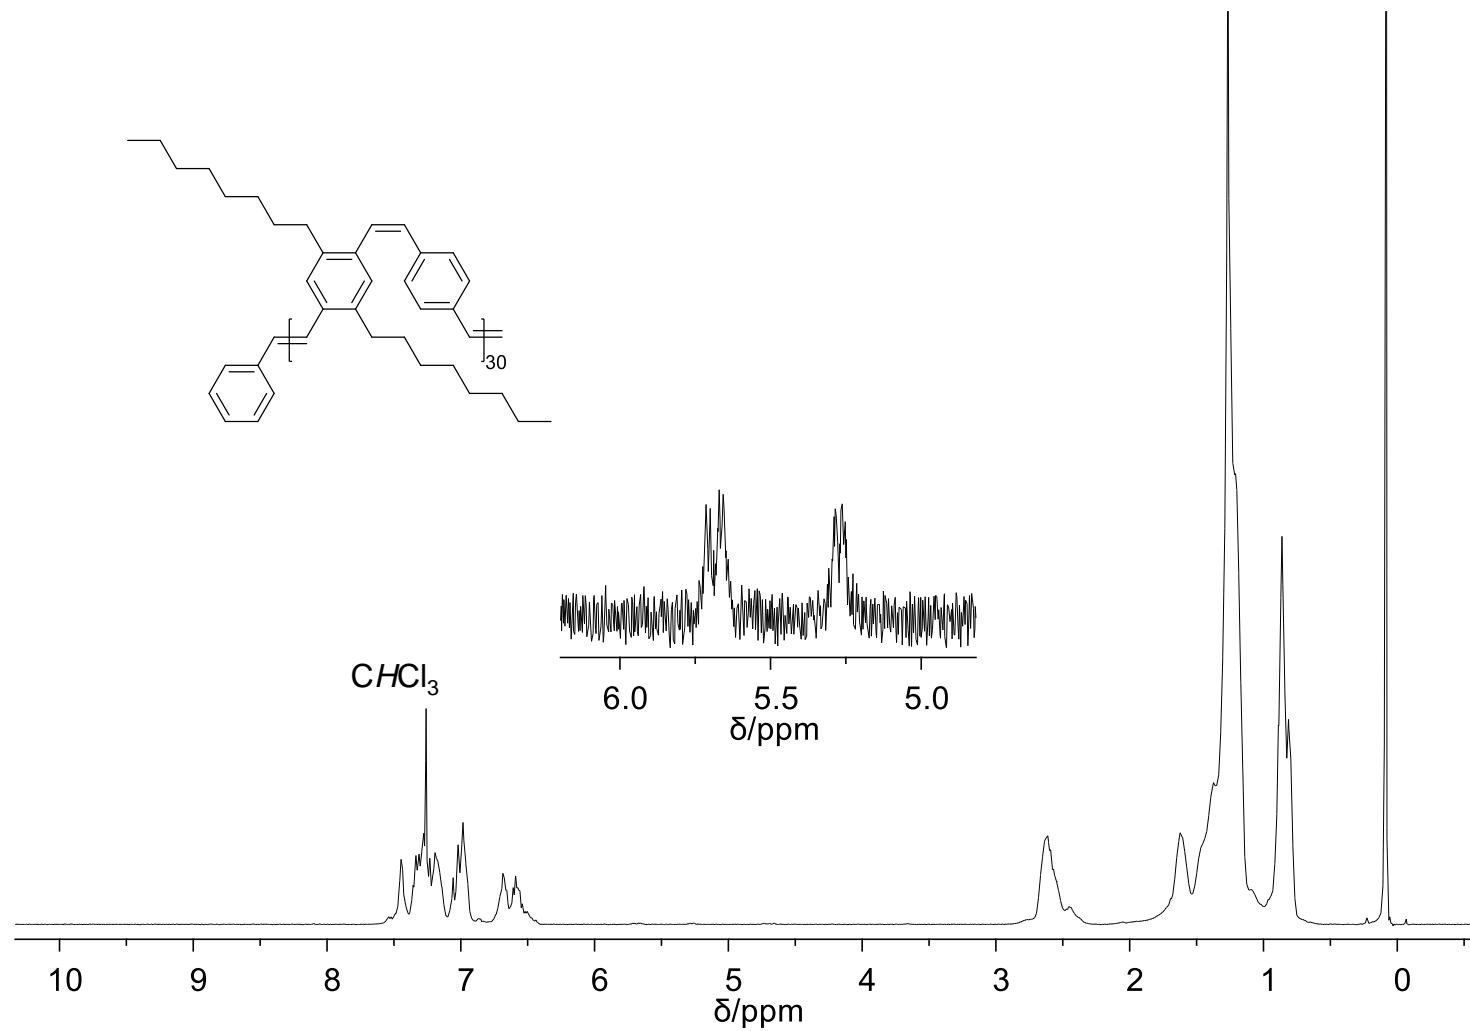

8.  $^1\text{H}$  NMR ( $\text{CDCl}_3$ , 400 MHz) of *cis/trans*-vinylene Poly(*p*-phenylenevinylene-2,5-dioctyl-*p*-phenylenevinylene)s (P1d)

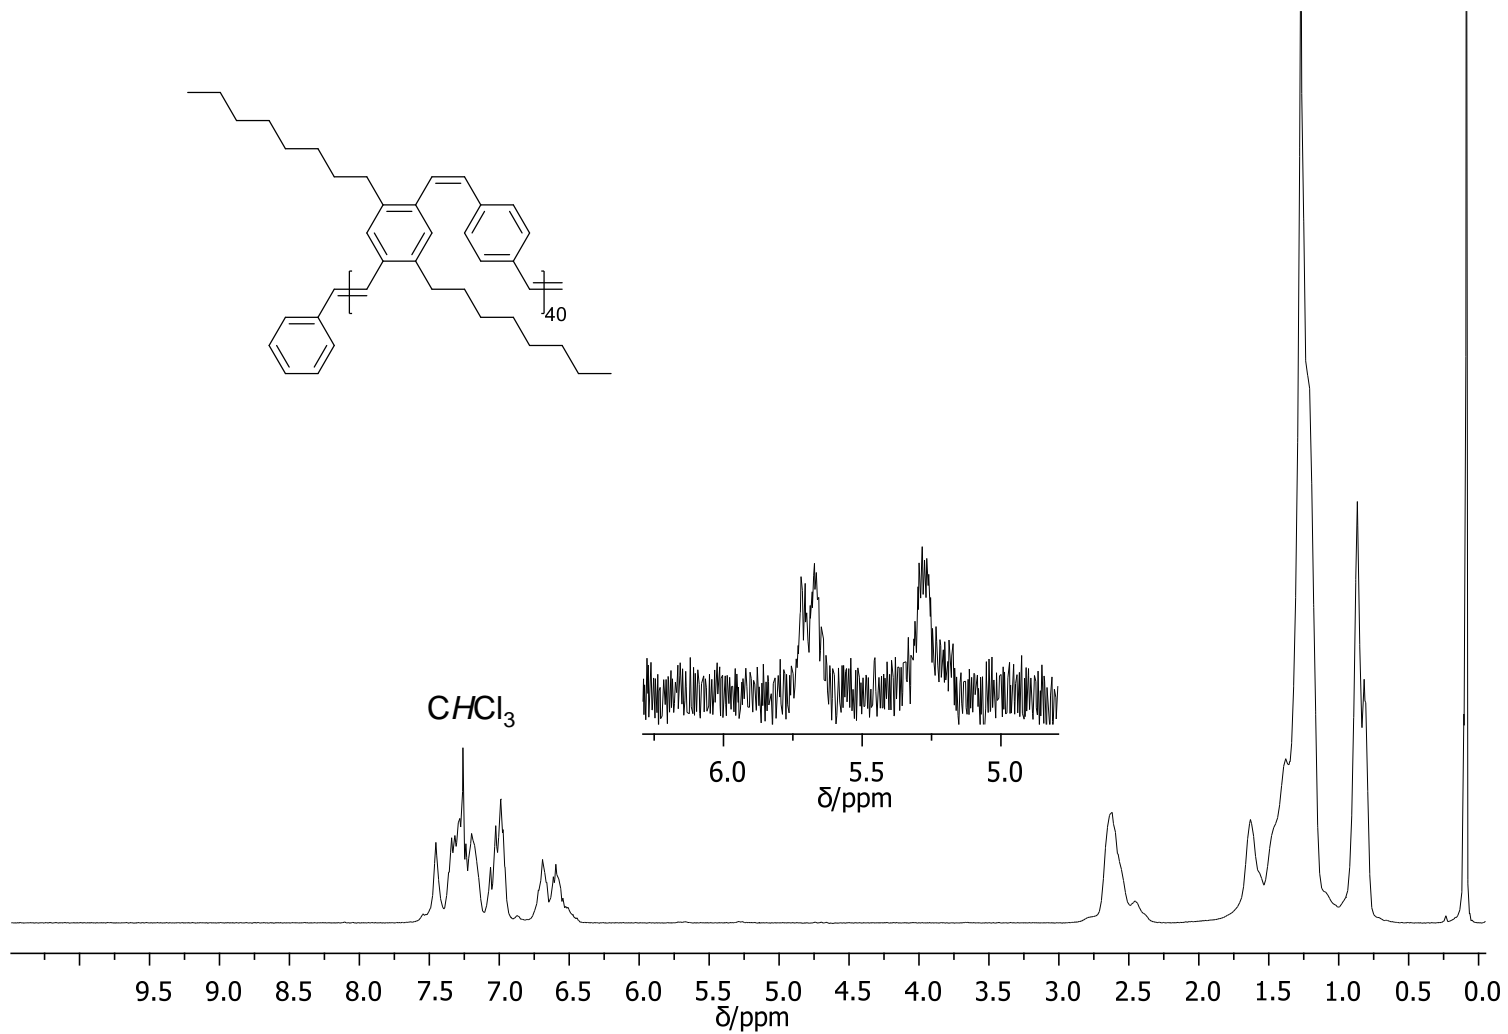

9.  $^1\text{H}$  NMR ( $\text{CDCl}_3$ , 400 MHz) of *trans*-vinylene Poly(*p*-phenylenevinylene-2,5-dioctyl-*p*-phenylenevinylene)s (P2a)

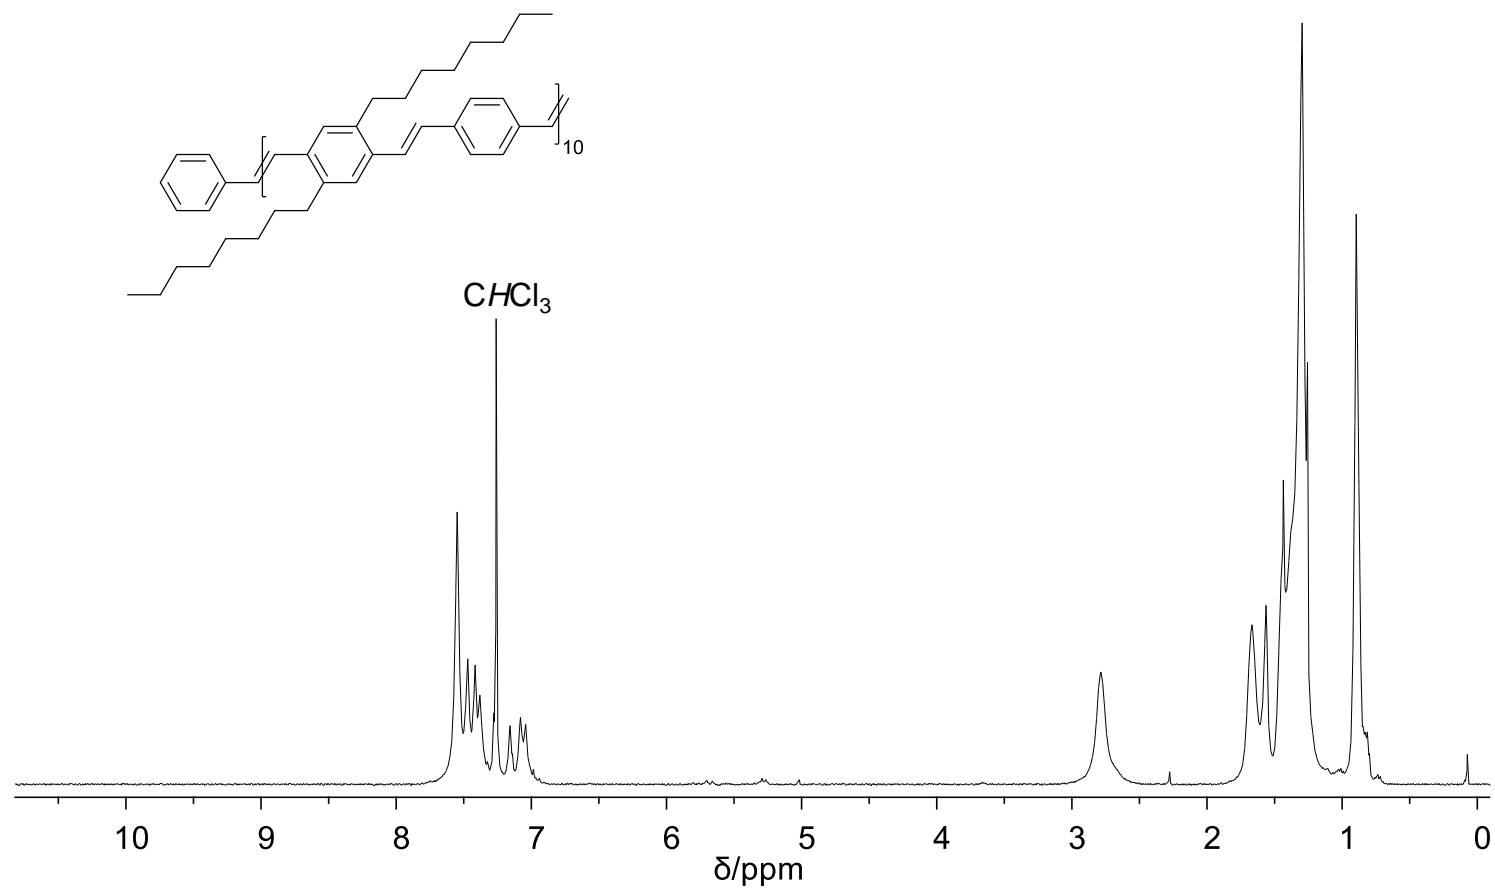

10.  $^1\text{H}$  NMR ( $\text{CDCl}_3$ , 500 MHz) of *trans*-vinylene Poly(*p*-phenylenevinylene-2,5-dioctyl-*p*-phenylenevinylene)s (P2b)

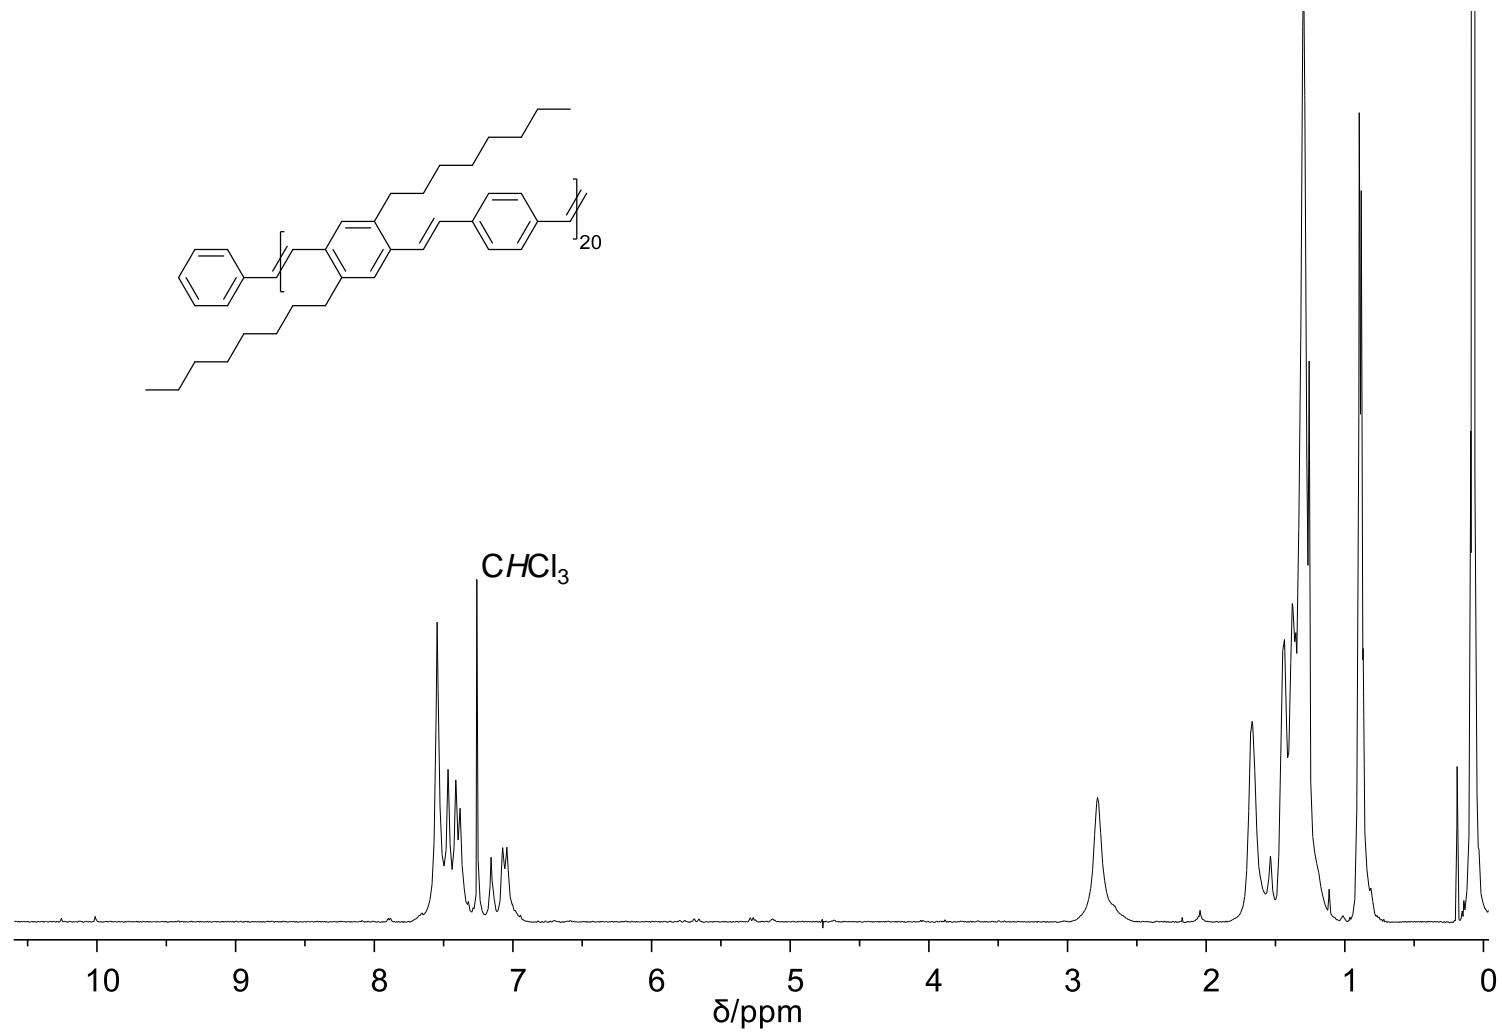

11.  $^1\text{H}$  NMR ( $\text{C}_6\text{D}_6$ , 400 MHz) of *cis/trans*-vinylene Poly(2,5-dioctyl-*p*-phenylenevinylene)s (P3a)

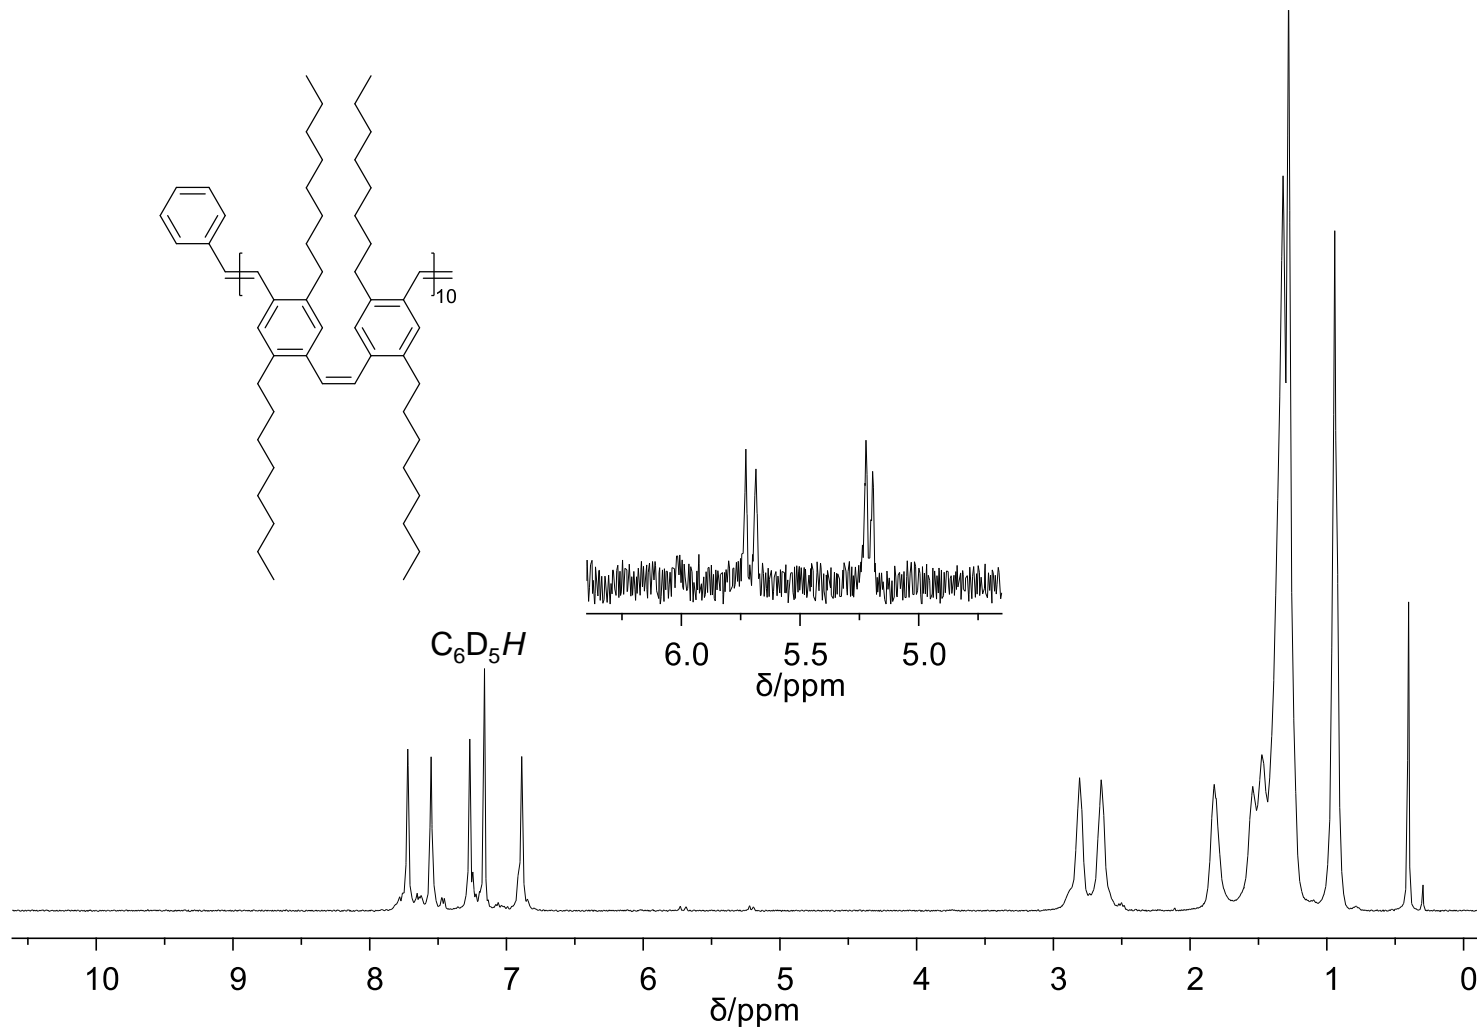

12.  $^1\text{H}$  NMR ( $\text{CDCl}_3$ , 500 MHz) of *cis/trans*-vinylene Poly(2,5-dioctyl-*p*-phenylenevinylene)s (P3b)

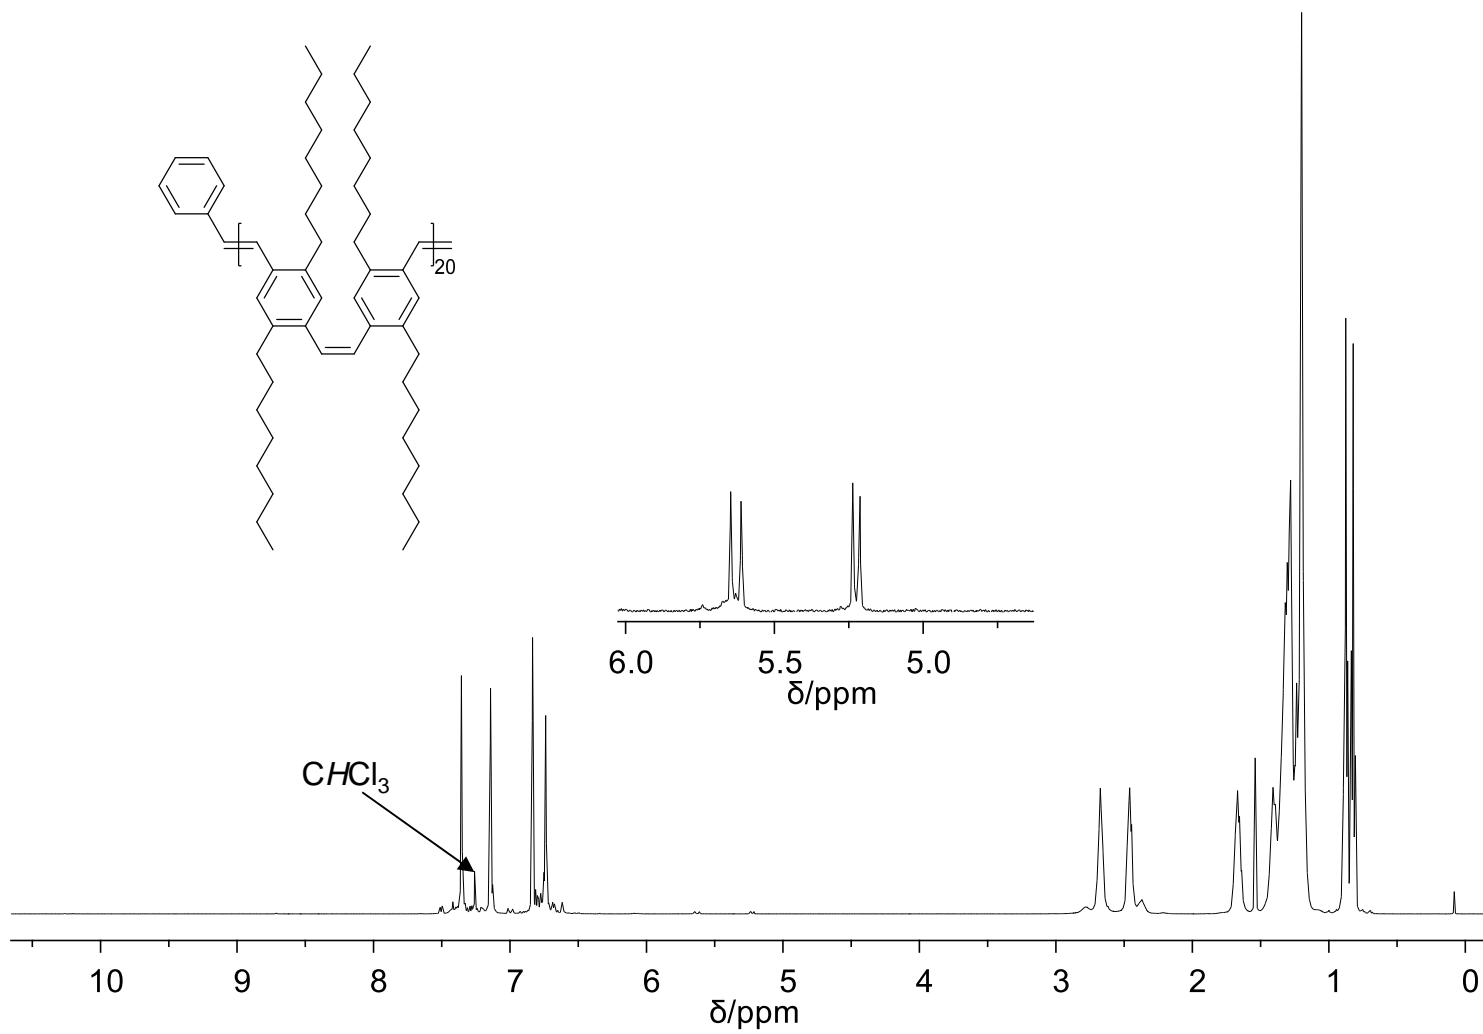

13.  $^1\text{H}$  NMR ( $\text{CDCl}_3$ , 500 MHz) of *cis/trans*-vinylene Poly(2,5-dioctyl-*p*-phenylenevinylene)s (P3c)

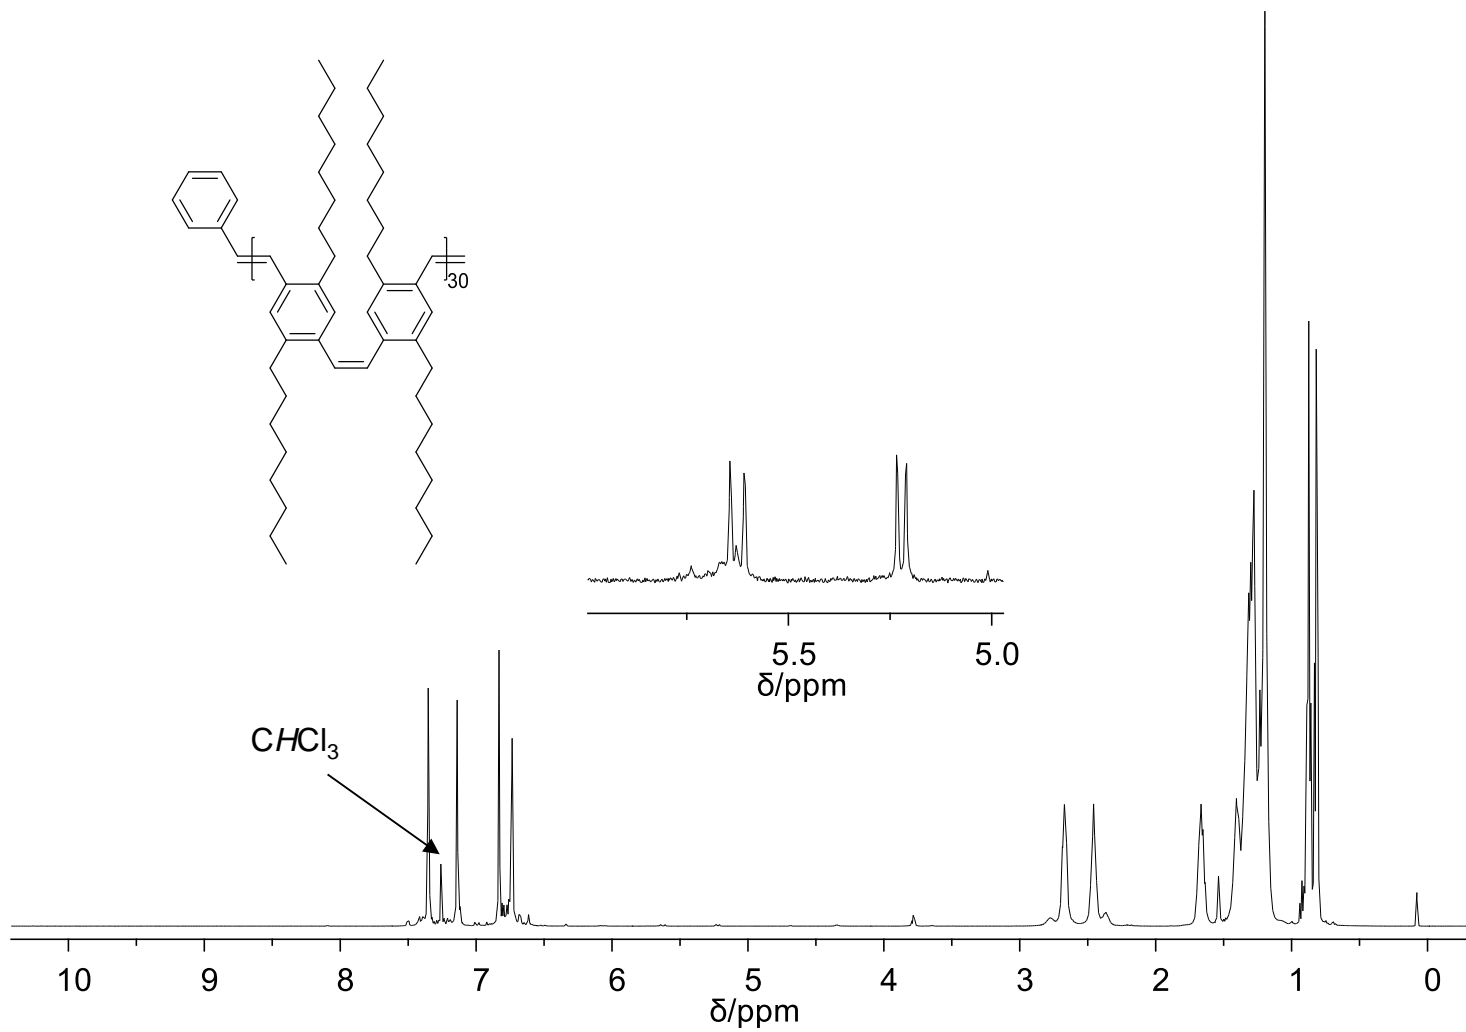



14.  $^1\text{H}$  NMR ( $\text{CDCl}_3$ , 400 MHz) of  $\alpha$ -Bromoester Functionalised Monotelechelic Poly(*p*-phenylenevinylene-2,5-dioctyl-*p*-phenylenevinylene)s (P4)

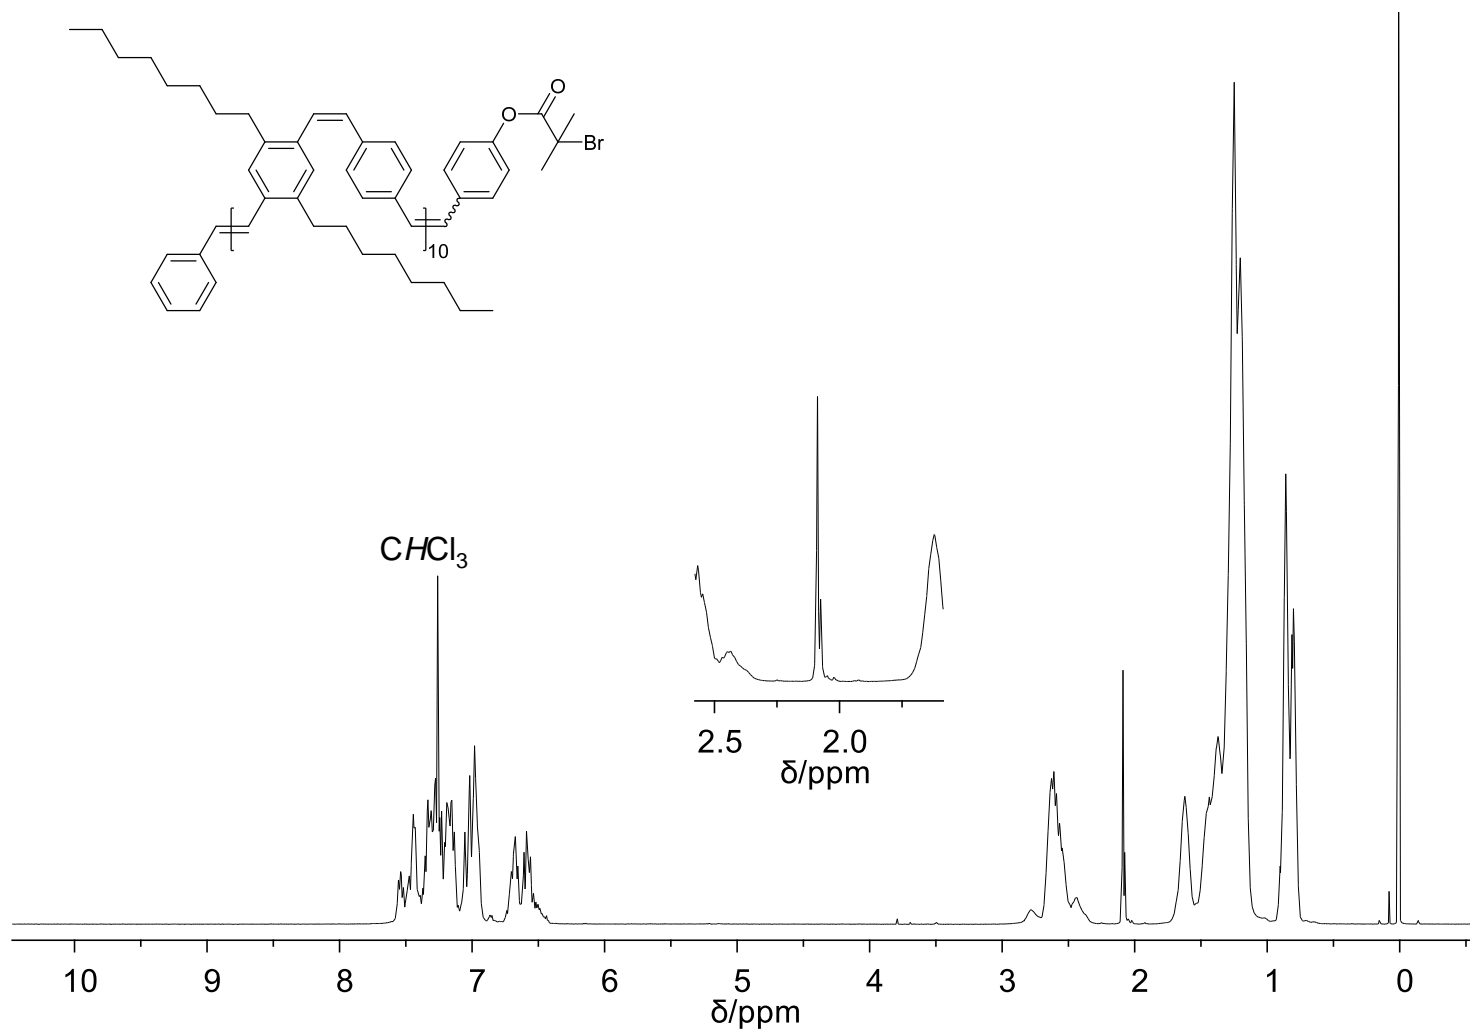

**15. GPC Trace of  $\alpha$ -Bromoester Functionalised Monotelechelic Poly(*p*-phenylenevinylene-2,5-dioctyl-*p*-phenylenevinylene)s (P4)**

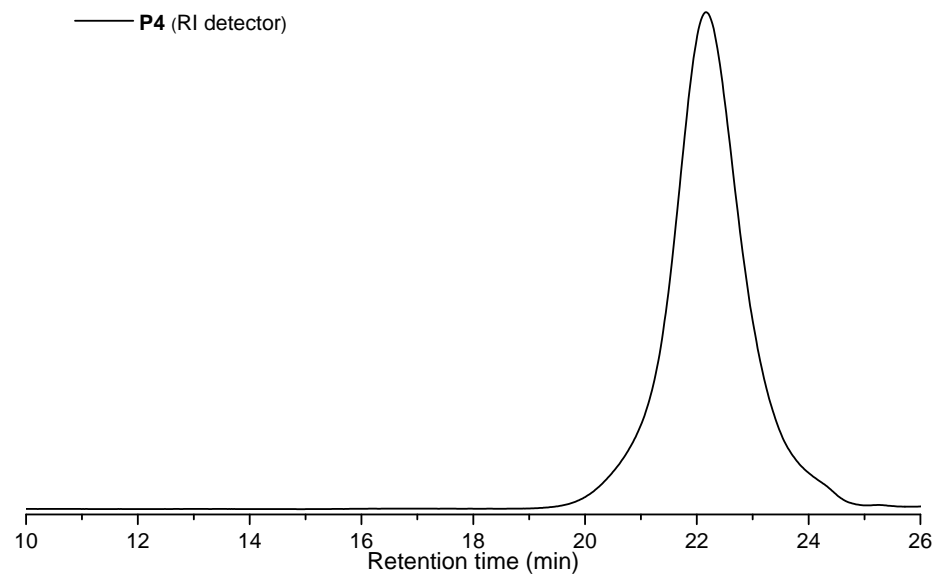

$$M_n = 6.0 \text{ kg mol}^{-1}$$

$$D_m = 1.31$$

## 16. Reactivity of M3 with G3 and G2

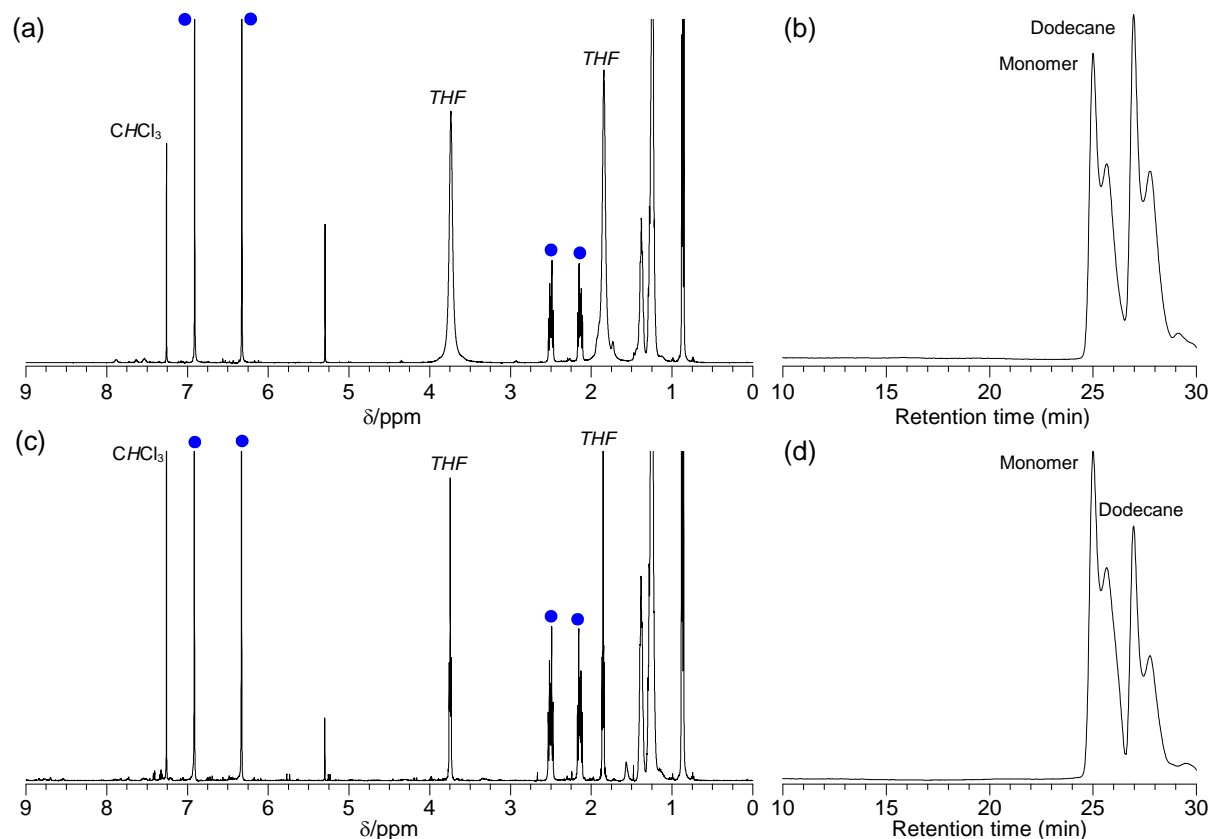

Crude <sup>1</sup>H NMR spectra and GPC chromatograms; (a) & (b) attempted ROMP of **M3** (indicated with ●) with **G2** and (c) & (d) attempted ROMP of **M3** (indicated with ●) with **G3** complex.

## 17. Measurement of Photoluminescence Quantum Yields of *cis/trans*-vinylene Poly(*p*-phenylenevinylene-2,5-dioctyl-*p*-phenylenevinylene)s (**P1a-d**), *trans*-vinylene Poly(*p*-phenylenevinylene-2,5-dioctyl-*p*-phenylenevinylene)s (**P2a-b**), *cis/trans*-vinylene Poly(2,5-dioctyl-*p*-phenylenevinylene)s (**P3a-c**) and $\alpha$ -Bromoester Functionalised Monotelechelic Poly(*p*-phenylenevinylene-2,5-dioctyl-*p*-phenylenevinylene)s (**P4**)

Photoluminescence quantum yields (PLQYs) were measured in dilute solutions of the polymers (**P1a-d**, **P2a-b**, **P3a-c** and **P4**) in chloroform against quinine sulfate as a reference (in 0.1 M H<sub>2</sub>SO<sub>4</sub> solution (PLQY = 0.52 at 25°C)).<sup>2</sup> Initially absorption spectra of each polymer sample were recorded in chloroform followed by fluorescence spectra, by exciting the polymers at 350 nm or 370 nm for polymers **P2a-b**. This process was repeated for five different concentrations for each sample, with the intensity of the absorption at 350 nm (370

nm for polymers **P2a-b**) kept under 0.1 to minimize the self-quenching and re-absorbance effect. PLQYs were calculated for each sample using Equation 1.

$$Q = Q_R \frac{I}{I_R} \frac{OD_R}{OD} \frac{n^2}{n_R^2} \text{ (Equation 1)}$$

Q = quantum yield, I = integrated intensity, n = refractive index of the solvent, OD = optical density and the subscript R refers to the reference fluorophore (quinine sulfate).

Values for OD<sub>R</sub> and I<sub>R</sub> were obtained by measuring both the optical density at 350 nm (370 nm for polymers **P2a-b**) and the integrated fluorescence (360-685 nm, λ<sub>ex</sub> = 350 nm and 380-685 nm, λ<sub>ex</sub> = 370 nm for polymers **P2a-b**), with solutions of fluorescein at five different concentrations (optical densities between 0.01 and 0.1). Plotting of the optical density vs. the integrated fluorescence of the five solutions resulted in a linear gradient.

## 18. References

1. J. A. Love, J. P. Morgan, T. M. Trnka and R. H. Grubbs, *Angew. Chem.-Int. Edit.*, 2002, **41**, 4035-4037.
2. W. H. Melhuish, *J. Phys. Chem.*, 1961, **65**, 229-235.
